# Supplementary material
Source: publisher site journal article supplement (https://en-cdn.bio-protocol.org/attached/file/20171120/Supplemental%20Figure%20S1.docx)

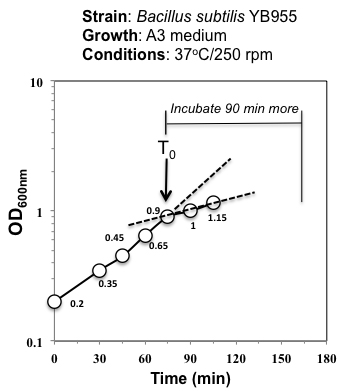


**Figure S1. Growth conditions**

Supplement: Supplementary file 1 [file Supplemental%20Figure%20S1.docx]
